# Supplementary material
Source: PubMed Central journal article supplement (PMC4902616)
Supplement: supp_pp.16.00332_00332revSuppl_Tables.pdf [file supp_pp.16.00332_00332revSuppl_Tables.pdf]

1 **Supplemental Table S1.** Information about oligonucleotides used for the small RNA blot and  
 2 qPCR

| <b>Primer/Probe</b>  |         | <b>Sequence (5' to 3')</b> |                             |
|----------------------|---------|----------------------------|-----------------------------|
| <b>For small-RNA</b> |         |                            |                             |
| <b>Northern</b>      |         |                            |                             |
| Figure 2             | miR156  | GTGCTCACTCTCTTCTGTCA       |                             |
|                      | miR172  | ATGCAGCATCATCAAGATTCT      |                             |
| Figure 3             | miR164a | TGCACGTGCCCTGCTTCTCCA      |                             |
|                      | miR164c | CGCACGTGCCCTGCTTCTCCA      |                             |
|                      | miR319a | GGGAGCTCCCTTCAGTCCAA       |                             |
| Figure 5             | miR166a | GGGGAATGAAGCCTGGTCCGA      |                             |
|                      | miR824  | TCCCTTCTCACAAATGGTCTA      |                             |
|                      | miR168  | TTCCCGACCTGCACCAAGCGA      |                             |
|                      | miR390a | GGCGCTATCCCTCCTGAGCTT      |                             |
|                      | miR167a | TAGATCATGCTGGCAGCTTCA      |                             |
|                      | miR403  | CGAGTTTGTGCGTGAATCTAA      |                             |
|                      | miR395  | GAGTCCCCCAAACACTTCAG       |                             |
|                      | siR255  | TACGCTATGTTGGACTTAGAA      |                             |
|                      | siR752  | AACGCTATGTTGGACTTAGGA      |                             |
|                      | siR289  | TATGCTATGTTGGACTTAGAA      |                             |
|                      | siR850  | GTCGATATGTTGAACTTAGAA      |                             |
|                      | miR393  | GATCAATGCGATCCCTTTGGA      |                             |
|                      | miR399b | CAGGGCAACTCTCCTTTGGCA      |                             |
|                      | miR408  | GCCAGGGAAGAGGCAGTGCAT      |                             |
|                      | miR396  | CAGTTCAAGAAAGCTGTGGAA      |                             |
|                      | miR161  | CCCCGATGTAGTCACTTTCAA      |                             |
|                      | miR159b | AAGAGCTCCCTTCAATCCAAA      |                             |
|                      | miR165a | GGGGGATGAAGCCTGGTCCGA      |                             |
|                      | miR163  | ATCGAAGTTCCAAGTCCTCTTCAA   |                             |
|                      | 5S rRNA | GAGGGATGCAACACGAGGACTT     |                             |
| <b>For qPCR</b>      |         |                            |                             |
| Figure 2             | miR156a | F                          | GGACAAGAGAAACGCAAAGAAAC     |
|                      |         | R                          | AGTGAGCACGCAAGAGAAGCAAG     |
|                      | miR156b | F                          | AGAGGGAGAGATGGTGATTGAGGAATG |

|         |   |                             |
|---------|---|-----------------------------|
|         | R | GAGAGGTCAAGCAGGCAGAGATAGG   |
| miR157c | F | GAGAGCACTAAGGATGACATGCAA    |
|         | R | TCATCCACATGCGGTGTGA         |
| miR172a | F | ATCTGTTGATGGACGGTGGTGATTC   |
|         | R | GAGAGGGAAAGAATAGTCGTTGATTGC |
| miR172b | F | TAGGCGCAGCACCATTAAGATTCAC   |
|         | R | GGTATTTGTAGCCGTCGATTGTTGATG |
| SPL3    | F | TGAGTTTGATGAAGCCAAGC        |
|         | R | TCACACGTTTCACCGTCTTT        |
| SPL4    | F | CACAATGAGCGAAGAAGGAA        |
|         | R | TTGATTCTGCATCACACCT         |
| SPL9    | F | AGAACATTGGATACAAGAGTGATGAGG |
|         | R | GTTTGAGTCGCCAATTCCCTTGTAGC  |
| SPL11   | F | CCAGCAGGAAAGTCCAAGTT        |
|         | R | AGAGAGAGAGCACGGTGGAT        |
| TOE1    | F | CTCAGCGTGGAGTTAGCTTG        |
|         | R | CCGAGGATCCATAAGGAAGA        |
| TOE2    | F | ACCACCACCATAGCTTCCTC        |
|         | R | GGCCTTCCAACCTTATTCAA        |

|            |         |   |                             |
|------------|---------|---|-----------------------------|
| Figure 3/4 | miR164a | F | CGAAATCCGTCTCATTGCTTATTTGC  |
|            |         | R | AGCTCATGTTGGAGAAGTTAAGTACG  |
|            | miR164b | F | TCTCACCACAAATGCGTGTATATATGC |
|            |         | R | GAAGATGGGCACATGAAGAATAACTC  |
|            | miR164c | F | GAGTAACACTTGATGGAGAAGCAGGG  |
|            |         | R | CTGTTCTATCCATTGACGATTGCATCC |
|            | miR319a | F | GAGAGCTTCCTTGAGTCCATTACAG   |
|            |         | R | CCGCATCATTCATTCATTTAACGAGTC |
|            | miR319c | F | GCCGACTCATCCATCCAAACTC      |
|            |         | R | AATATCTCCCGCATTCACACAGTC    |
|            | CUC1    | F | GCACGTGTCTGTTTCTCCAATAA     |
|            |         | R | ATCTGTCCCGATGATCCCAA        |
|            | CUC2    | F | ACCACTACCCTCGGCTACAC        |
|            |         | R | AGGGACAGTGGAGAAACAGG        |
|            | NAC1    | F | TTTGATGAGACAGCCTCTGC        |
|            |         | R | AATTGGAGAAGCAGGGTACG        |
|            | TCP3    | F | GAGCTAAACATTGTAAAACAG       |
|            |         | R | CAAGTGGGGTTAAAGGTTTCC       |

|          |         |   |                             |
|----------|---------|---|-----------------------------|
|          | TCP4    | F | GGCTCCTTCGAATCATAACCT       |
|          |         | R | GGAGGCGGAAGCAGAGGTGTG       |
| Figure 5 | miR159a | F | TTCAAACATGAGTTGAGCAGGGTAAAG |
|          |         | R | AGGGCAAGTTAAAGCTCCTGAGATATC |
|          | miR167c | F | GCCAGCATGATCTTGTCTTCTCTC    |
|          |         | R | ATTAGCAGGTGAAACTACCAGCATGAC |
|          | miR168a | F | CGGGAACCAATTCGGCTGACAC      |
|          |         | R | CCAATCCCTGCTCACAAACCAATAAAG |
|          | miR165a | F | TTATCATGAGGGTTAAGCTATTT     |
|          |         | R | CGAGGATACTCTCTATGATCACT     |
|          | miR165b | F | AGGCTATTTCTGTTGTGGGGAATGTTG |
|          |         | R | GGATGAAGCCTGGTCCGACGATAC    |
|          | miR166a | F | GACTCTGGCTCGCTCTATTCATGTTG  |
|          |         | R | GCCTGGTCCGAAGACGCTAAAAC     |
|          | miR396a | F | TTCCACAGCTTTCTTGAAGTCTG     |
|          |         | R | CCCACAGCTTTATTGAACCGCAAATC  |
|          | miR403a | F | AGAGTCGTATTACATGTTTTGTGCTTG |
|          |         | R | CGAGTTTGTGCGTGAATCTAATCCAAC |
|          | miR408a | F | AGAGAGACAGGGAACAAGCAGAGC    |
|          |         | R | AAGAGGCAGTGCATGGGTAGAGAC    |
|          | miR824a | F | CCAATACCCCCAGTCTCTAAATT     |
|          |         | R | CCCTGCTGCACCATGAGAAC        |
|          | MYB33   | F | ATGCAGATGAAACTCCACCA        |
|          |         | R | TCGCTCATGCTACCTGTCTC        |
|          | MYB65   | F | CATCGCAGGTAGAGGAGTCA        |
|          |         | R | ATCAACAAACTGTGCTTCGC        |
|          | ARF3    | F | TTCCCGCCTACTCAATAACC        |
|          |         | R | CCACACCAAATGTTCTCTG         |
|          | ARF4    | F | TCAGGTGTTATGGACCTGGA        |
|          |         | R | ATTGCGGGAATGATTTAAGC        |
|          | AGO1    | F | AAGGAGGTCGAGGAGGGTAT        |
|          |         | R | AGCTCGGGAAGTATTGTCT         |
|          | PHB     | F | AACAGGGCTATGCTCATCTGC       |
|          |         | R | AACGAACGACCAATTCACGAAC      |
|          | PHV     | F | GATGGTCTCCAATGAGTAGTGA      |
|          |         | R | GGACACCACTTCCAAAAGTTG       |
|          | REV     | F | GCCAAGCTAATGCAACAGGGA       |

|       |   |                          |
|-------|---|--------------------------|
|       | R | AGGAGAAGGCAAGACAATGCA    |
| GRF1  | F | CAACAATGTCGATTCTTGGC     |
|       | R | AGATGGAGCCATAGGGATTG     |
| GRF3  | F | CAGATGGAGGACACATCCTG     |
|       | R | TGGAGAGACAAGTGGCTGAG     |
| AGO2  | F | GAGCGGTGGTGAAATCATTG     |
|       | R | CGCACAACTCTCCCTCTCTC     |
| ARPN  | F | ACCTTTAACGCTGTGGGTTG     |
|       | R | CCTTCACTACGTTGTGCATCC    |
| AGL16 | F | AGGTTTCAGAGGTCGAGGGT     |
|       | R | ATGATCATGCTGCGGTTG       |
| DCL1  | F | CCATTCCTAAGCGAAGTTTCA    |
|       | R | CCGAGCAACATAAAGATCCA     |
| SE    | F | TATGGTGATGAAAGGCCTCA     |
|       | R | ACCATAACCTCCACGTCCTC     |
| HYL1  | F | TGTTTCCTCTGGTGTTTCCA     |
|       | R | CTCATAAACAGGCGTTGGG      |
| ABH1  | F | TGCTGGAAAGTTTCATGAGC     |
|       | R | CCCTCGAATGATCAGAAGGT     |
| CBP20 | F | CAGGTTCGTGATGAATACCG     |
|       | R | AGCTTGAGGATAAGCTCCCA     |
| RDR6  | F | AAGAGTTTAGGCCGTGCTGT     |
|       | R | GCTCATTCGCCAAGTTTCTT     |
| SDN1  | F | GAATCAACTAACATGGTAGCTGT  |
|       | R | TCTACCACAGAGAGACTAGCAT   |
| SDN2  | F | GAAGATGGAACCGACAAAGATCG  |
|       | R | GATCTTGAGCAGTAAGTCCAGTA  |
| SDN3  | F | GATTGTGAGATGGTTACCTGTGA  |
|       | R | TGAATATCTGCAACAGAAAGAGTA |
| SDN5  | F | AAGCGAAAGCAGAACTCGAT     |
|       | R | CCAATCCAGGAAGGTAGAGC     |
| DDL   | F | GAAAGAAGGATTGCCGACAT     |
|       | R | TTCCCGGTACTGAATGACA      |

---

**For ChIP-qPCR**

---

|          |         |   |                       |
|----------|---------|---|-----------------------|
| Figure 5 | miR156a | F | TTGGCTAACAATTTGCCACT  |
|          |         | R | TTAGGGCTTGTTGATGTTGG  |
|          | miR164a | F | TCATGATGATAAATGCCGAAG |

|            |     |   |                           |
|------------|-----|---|---------------------------|
|            |     | R | AGTCTTTGACGACCCACCTT      |
| miR164c    |     | F | GGTGATGAGTTTGGGTCAGTT     |
|            |     | R | CGCATTTACATATACGCATGG     |
| miR166a    |     | F | TGAGCCTATTTCCAACGTTCT     |
|            |     | R | TTGAACATGGCCATAATTTGTT    |
| miR168a    |     | F | TGCTCTTTATCTCGGAATATTTG   |
|            |     | R | GTGAAAATTTGGTGGGCATT      |
| miR172b    |     | F | AGAGACACGCAATGACTTCG      |
|            |     | R | TGGTATTAAGGACTTGTAGGACTCA |
| TOE1       |     | F | TGGACCAATATCCATCAAGC      |
|            |     | R | TTAGGAATGTACGTTGGTGTGTT   |
| Figure 5/1 | FLC | F | TTTGTGTTAATCTCCCGAACA     |
|            |     | R | GTGTTACCAAAGTCGTGCCTAC    |

---

**For MNase-qPCR**

---

|          |           |   |                           |
|----------|-----------|---|---------------------------|
| Figure 8 | MIR156A C | F | AAAGAATCAAAGAGAGGGAGGGA   |
|          |           | R | AAAGGGTCTCAAATGGAATCTCT   |
|          | MIR156A B | F | TGGCTCTTGTCGCTTTCTTT      |
|          |           | R | TTCAATTCAATGCGTCGCCA      |
|          | MIR156A A | F | TGGCGACGCATTGAATTGAA      |
|          |           | R | AGACCATTTCATTGTTCACTCTCA  |
|          | MIR156A D | F | AAGCTTTGTGTTAGATCTGAGTTTT |
|          |           | R | TCCCTCCCTCTCTTTGATTCTTTG  |
|          | MIR164A C | F | GCGATCGTTTAGCTCTCTTCA     |
|          |           | R | ATGATGGCATCTCACGCAAA      |
|          | MIR164A B | F | AAGGTCTTGCTTGCAACGC       |
|          |           | R | TGCTAGGTTGCTAGGCGTAC      |
|          | MIR164A A | F | TTAGGACAACACGCAAAGCC      |
|          |           | R | GAAGGGTCAAAAGGGCAAGG      |
|          | MIR164A D | F | TCATGTGCTTGGAATGCGG       |
|          |           | R | TGTTTGTGGTTTGCACGTG       |
|          | FLC B     | F | GCTACTTTTGCATTGCCTTAGT    |
|          |           | R | CCGTATCGTAGGGGAGGAAA      |
|          | FLC A     | F | TGAACTCTCCGACTTCTCAA      |
|          |           | R | AGGCGAGTGGTTCTTTGTTT      |
|          | FLC C     | F | GGATGCGTCACAGAGAACAG      |
|          |           | R | CGACAAGTCACCTTCTCCAA      |
|          | ACT2 P    | F | GGATCGATGCCAAAAGTCCC      |

|         |   |                        |
|---------|---|------------------------|
|         | R | CGTTCTAAATTTTGTGACGTGA |
| ACT2 GB | F | GCTGGAATCCACGAGACAAC   |
|         | R | CCACCACTGAGCACAATGTT   |
| FWA GB  | F | CATCCACCAACTCTACCAGC   |
|         | R | AGCCATCTCTTTGCACCTAG   |
| EVD GB  | F | CGACATGTTCTCTTGCCCTT   |
|         | R | TGTTTGAGGAATCCGATGCT   |

---

**RT-qPCR**

---

|                     |       |   |                       |
|---------------------|-------|---|-----------------------|
| Figure 1            | JAZ9  | F | AGAAGAGTTTAGGCCGTGCTG |
|                     |       | R | TCGCCTTGTTTCTTGCTTGTG |
|                     | JAZ10 | F | AGAAGAGTTTAGGCCGTGCTG |
|                     |       | R | TCGCCTTGTTTCTTGCTTGTG |
|                     | JAZ1  | F | AGAAGAGTTTAGGCCGTGCTG |
|                     |       | R | TCGCCTTGTTTCTTGCTTGTG |
|                     | UBQ6  | F | AGAAGAGTTTAGGCCGTGCTG |
|                     |       | R | TCGCCTTGTTTCTTGCTTGTG |
|                     | HSP70 | F | TTCAAACCCAAGGACAGAG   |
|                     |       | R | ATGGAGCCAGTGGAGAAGTG  |
| Figure 2-<br>4, 6/8 | RDR6  | F | AGAAGAGTTTAGGCCGTGCTG |
|                     |       | R | TCGCCTTGTTTCTTGCTTGTG |
|                     | SE    | F | GTGTACAAGCATCTCAAGC   |
|                     |       | R | CCTGTCTTGTCTACAAGC    |
|                     | ABH1  | F | GAAAGCTTCAGCCAATGC    |
|                     |       | R | ACATCTTCACCCGAGAAC    |
|                     | TUB   | F | CTCAAGAGGTTCTCAGCAGTA |
|                     |       | R | TCACCTTCTTCATCCGCAGTT |

---

1

2

3

1 **Supplemental Table S2.** Numbers of lateral root in WT and *arp6*

2

| plant | WT (12 d) |       | <i>arp6</i> (12 d) |       | WT (8 d) |       | <i>arp6</i> (8 d) |       |
|-------|-----------|-------|--------------------|-------|----------|-------|-------------------|-------|
|       | LR        | LR/cm | LR                 | LR/cm | LR       | LR/cm | LR                | LR/cm |
| #1    | 12        | 2.22  | 9                  | 2.13  | 12       | 2.22  | 9                 | 2.13  |
| #2    | 14        | 2.08  | 12                 | 3.04  | 14       | 2.08  | 12                | 3.04  |
| #3    | 16        | 2.62  | 12                 | 3.63  | 16       | 2.62  | 12                | 3.63  |
| #4    | 12        | 2.04  | 10                 | 3.29  | 12       | 2.04  | 10                | 3.29  |
| #5    | 11        | 1.95  | 12                 | 2.72  | 11       | 1.95  | 12                | 2.72  |
| #6    | 18        | 2.83  | 9                  | 2.36  | 18       | 2.83  | 9                 | 2.36  |
| #7    | 12        | 1.94  | 10                 | 2.2   | 12       | 1.94  | 10                | 2.20  |
| #8    | 11        | 1.92  | 10                 | 3.76  | 11       | 1.92  | 10                | 3.76  |
| #9    | 15        | 2.52  | 13                 | 2.7   | 15       | 2.52  | 13                | 2.70  |
| #10   |           |       | 8                  | 2.08  |          |       | 8                 | 2.08  |
| av.   | 13.44     | 2.23  | 10.5               | 2.79  |          | 1.38  |                   | 2.02  |
| s.d.  | 2.38      | 0.33  | 1.61               | 0.6   |          | 0.45  |                   | 0.65  |

3 LR indicates lateral root number.

4

5

6

7

1 **Supplemental Table S3.** Root lengths of WT and *arp6*

|      | WT( 8 d) | <i>arp6</i> (8 d) | WT( 11 d) | <i>arp6</i> (11 d) |
|------|----------|-------------------|-----------|--------------------|
| #1   | 3.89     | 1.55              | 5.42      | 4.23               |
| #2   | 3.44     | 1.34              | 6.73      | 3.95               |
| #3   | 3.29     | 2.00              | 6.12      | 3.31               |
| #4   | 2.39     | 2.42              | 5.88      | 3.04               |
| #5   | 3.24     | 2.48              | 5.64      | 4.42               |
| #6   | 3.78     | 2.48              | 6.37      | 3.81               |
| #7   | 3.01     | 2.15              | 6.19      | 4.54               |
| #8   | 2.59     | 1.41              | 5.71      | 2.66               |
| #9   | 4.11     | 1.68              | 5.95      | 4.82               |
| #10  | 3.69     | 1.85              |           | 3.85               |
| #11  | 3.11     | 1.62              |           |                    |
| #12  | 3.36     | 1.47              |           |                    |
| #13  | 4.34     | 2.48              |           |                    |
| #14  |          | 2.61              |           |                    |
| #15  |          | 2.36              |           |                    |
| av.  | 3.40     | 2.00              | 6.00      | 3.86               |
| s.d. | 0.55     | 0.45              | 0.39      | 0.67               |

2

3



Supplemental Table 4. Comparison of individual miRNA abundance in small RNA librari

|          | sequence | width | is.miRNA | miRNA     | arp6_1_mu | arp6_2_mu | arp6_3_mu |
|----------|----------|-------|----------|-----------|-----------|-----------|-----------|
| 2009963  | ACTCATAA | 21    | TRUE     | ath-miR50 | 5         | 11        | 10        |
| 11236188 | TGAGATGA | 21    | TRUE     | ath-miR18 | 1         | 0         | 0         |
| 9708740  | TAAGTTAA | 21    | TRUE     | ath-miR18 | 0         | 0         | 0         |
| 12514020 | TTGTGCGC | 21    | TRUE     | ath-miR56 | 0         | 0         | 0         |
| 12221521 | TTCGATGT | 20    | TRUE     | ath-miR77 | 0         | 2         | 0         |
| 11928588 | TGTTTGTT | 22    | TRUE     | ath-miR83 | 0         | 0         | 0         |
| 12700368 | TTTGACGT | 21    | TRUE     | ath-miR39 | 151       | 145       | 151       |
| 11146951 | TGAAGCTC | 22    | TRUE     | ath-miR16 | 11        | 10        | 12        |
| 12587351 | TTTAGGTC | 21    | TRUE     | ath-miR84 | 7         | 5         | 3         |
| 1555553  | ACATATGA | 21    | TRUE     | ath-miR55 | 29        | 21        | 18        |
| 12247696 | TTCGTTGT | 21    | TRUE     | ath-miR85 | 13        | 8         | 8         |
| 9831861  | TACGCATT | 22    | TRUE     | ath-miR77 | 1         | 0         | 2         |
| 11602163 | TGGGTTGA | 24    | TRUE     | ath-miR56 | 1         | 1         | 0         |
| 2399955  | AGAGAGT  | 22    | TRUE     | ath-miR81 | 0         | 2         | 1         |
| 8534003  | GGAATCTT | 21    | TRUE     | ath-miR17 | 1         | 1         | 1         |
| 10158788 | TATGATCA | 21    | TRUE     | ath-miR56 | 1         | 3         | 0         |
| 12338890 | TTGAAGAC | 24    | TRUE     | ath-miR16 | 686       | 601       | 546       |
| 7769283  | GATCCCCC | 20    | TRUE     | ath-miR81 | 4         | 4         | 2         |
| 11178664 | TGACAGA  | 20    | TRUE     | ath-miR15 | 4         | 8         | 8         |
| 2827479  | AGGCTTTT | 21    | TRUE     | ath-miR56 | 2         | 0         | 3         |
| 12263198 | TTCTCAAG | 21    | TRUE     | ath-miR82 | 78        | 60        | 78        |
| 11178675 | TGACAGA  | 20    | TRUE     | ath-miR15 | 4885      | 4276      | 5284      |
| 12028489 | TTAGATTC | 21    | TRUE     | ath-miR40 | 3177      | 2830      | 2786      |
| 11384618 | TGCCAAAC | 21    | TRUE     | ath-miR39 | 178       | 173       | 160       |
| 11300501 | TGATCTCT | 22    | TRUE     | ath-miR83 | 3         | 3         | 6         |
| 10154888 | TATGAGAC | 21    | TRUE     | ath-miR40 | 15        | 14        | 19        |
| 12433576 | TTGGACTC | 21    | TRUE     | ath-miR31 | 59        | 64        | 61        |
| 2834933  | AGGGACT  | 21    | TRUE     | ath-miR56 | 12        | 10        | 15        |
| 3475912  | ATCATGCT | 21    | TRUE     | ath-miR39 | 22        | 19        | 16        |
| 9999426  | TAGTCCGC | 21    | TRUE     | ath-miR82 | 3         | 2         | 9         |
| 3475826  | ATCATGCC | 21    | TRUE     | ath-miR39 | 289       | 227       | 236       |
| 11178689 | TGACAGA  | 20    | TRUE     | ath-miR15 | 4         | 3         | 2         |
| 12788414 | TTTTACTG | 21    | TRUE     | ath-miR50 | 27        | 26        | 27        |
| 12349009 | TTGACAGA | 21    | TRUE     | ath-miR15 | 1237      | 1055      | 984       |
| 3691737  | ATGAATTT | 21    | TRUE     | ath-miR86 | 19        | 12        | 14        |
| 12448447 | TTGGCATT | 20    | TRUE     | ath-miR39 | 86        | 93        | 78        |
| 2657183  | AGCTAAGC | 21    | TRUE     | ath-miR56 | 9         | 7         | 8         |
| 12025189 | TTAGAGTT | 21    | TRUE     | ath-miR78 | 99        | 88        | 75        |
| 12433569 | TTGGACTC | 21    | TRUE     | ath-miR31 | 898       | 737       | 726       |
| 12171987 | TTCCACAC | 21    | TRUE     | ath-miR39 | 2100      | 1769      | 1840      |

|          |          |    |      |           |       |       |       |
|----------|----------|----|------|-----------|-------|-------|-------|
| 6632395  | CTGAAGTC | 21 | TRUE | ath-miR39 | 80    | 74    | 70    |
| 9682280  | TAAGATCC | 22 | TRUE | ath-miR85 | 11    | 16    | 15    |
| 809842   | AAGCTCAC | 21 | TRUE | ath-miR39 | 277   | 218   | 211   |
| 11146943 | TGAAGCTC | 21 | TRUE | ath-miR16 | 1318  | 1239  | 1254  |
| 11335382 | TGATTGGA | 21 | TRUE | ath-miR77 | 90    | 82    | 91    |
| 12737151 | TTTGGATT | 21 | TRUE | ath-miR15 | 12342 | 10612 | 10927 |
| 10716267 | TCGGACCA | 21 | TRUE | ath-miR16 | 9256  | 9366  | 8244  |
| 12822051 | TTTTCTTC | 21 | TRUE | ath-miR83 | 4     | 6     | 3     |
| 11402788 | TGCCTGGC | 21 | TRUE | ath-miR16 | 103   | 63    | 82    |
| 12545875 | TTGTTTTG | 21 | TRUE | ath-miR56 | 90    | 75    | 88    |
| 10889118 | TCTCGCGC | 20 | TRUE | ath-miR56 | 12    | 10    | 16    |
| 10711155 | TCGCTTGG | 21 | TRUE | ath-miR16 | 120   | 133   | 123   |
| 10236078 | TATTGGCC | 21 | TRUE | ath-miR17 | 325   | 340   | 260   |
| 5456912  | CCCCAAA  | 20 | TRUE | ath-miR15 | 181   | 165   | 145   |
| 11115469 | TGAAAGTC | 21 | TRUE | ath-miR16 | 11514 | 9955  | 10618 |
| 5774248  | CCTTCTCA | 21 | TRUE | ath-miR82 | 148   | 145   | 125   |
| 11333895 | TGATTGAC | 21 | TRUE | ath-miR17 | 307   | 290   | 298   |
| 748539   | AAGATAAC | 21 | TRUE | ath-miR85 | 27    | 22    | 13    |
| 11843991 | TGTGTTCT | 21 | TRUE | ath-miR39 | 200   | 137   | 94    |
| 3749554  | ATGCACTC | 21 | TRUE | ath-miR40 | 949   | 737   | 874   |
| 11107952 | TGAAACCA | 21 | TRUE | ath-miR59 | 6     | 3     | 2     |
| 10494048 | TCCAATAG | 21 | TRUE | ath-miR86 | 12    | 6     | 12    |
| 11480930 | TGGAAGA  | 23 | TRUE | ath-miR56 | 75    | 56    | 67    |
| 11506489 | TGGAGAA  | 21 | TRUE | ath-miR16 | 130   | 122   | 110   |
| 11506498 | TGGAGAA  | 21 | TRUE | ath-miR16 | 88    | 78    | 80    |
| 10460098 | TCATGGTC | 21 | TRUE | ath-miR84 | 9     | 2     | 6     |
| 2296023  | AGAATCTT | 21 | TRUE | ath-miR17 | 3     | 11    | 7     |
| 12346641 | TTGAATTG | 21 | TRUE | ath-miR84 | 3008  | 2874  | 2620  |
| 164895   | AAACGAA  | 21 | TRUE | ath-miR83 | 39    | 35    | 39    |
| 10320009 | TCAATAGA | 21 | TRUE | ath-miR86 | 10    | 10    | 4     |
| 12040446 | TTAGGCTA | 21 | TRUE | ath-miR18 | 2     | 1     | 6     |
| 4175645  | ATTTCTAG | 21 | TRUE | ath-miR84 | 5     | 8     | 3     |
| 12227372 | TTCGCTTG | 22 | TRUE | ath-miR17 | 967   | 854   | 844   |
| 12223998 | TTCGCAGC | 21 | TRUE | ath-miR39 | 6     | 6     | 3     |
| 10363755 | TCACTCCT | 21 | TRUE | ath-miR84 | 15    | 10    | 22    |
| 11843988 | TGTGTTCT | 21 | TRUE | ath-miR39 | 21380 | 21356 | 19169 |
| 10471665 | TCATTGAC | 21 | TRUE | ath-miR39 | 22    | 25    | 10    |

ies between WT and arp6.

| arp6_4_mu | wt_1_multi | wt_2_multi | wt_3_multi | wt_4_multi | Likelihood ordering | FDR.DE   |
|-----------|------------|------------|------------|------------|---------------------|----------|
| 10        | 7557       | 5954       | 5876       | 5922       | 1 2>1               | 0        |
| 1         | 118        | 109        | 111        | 81         | 1 2>1               | 6.87E-13 |
| 1         | 17         | 26         | 19         | 24         | 1 2>1               | 5.94E-10 |
| 1         | 14         | 24         | 25         | 19         | 1 2>1               | 7.19E-10 |
| 0         | 47         | 43         | 38         | 35         | 1 2>1               | 6.22E-10 |
| 0         | 6          | 15         | 8          | 2          | 1 2>1               | 5.52E-08 |
| 132       | 1035       | 1165       | 850        | 1164       | 1 2>1               | 1.67E-11 |
| 6         | 62         | 46         | 49         | 38         | 1 2>1               | 8.98E-08 |
| 3         | 26         | 14         | 13         | 11         | 0.995 2>1           | 0.000216 |
| 19        | 87         | 66         | 75         | 62         | 1 2>1               | 1.71E-07 |
| 11        | 49         | 28         | 33         | 20         | 1 2>1               | 4.18E-05 |
| 0         | 2          | 2          | 2          | 3          | 1 2>1               | 2.62E-07 |
| 3         | 7          | 5          | 2          | 0          | 1 2>1               | 2.28E-05 |
| 2         | 3          | 1          | 9          | 1          | 1 2>1               | 2.55E-05 |
| 0         | 2          | 2          | 3          | 1          | 1 2>1               | 1.34E-07 |
| 1         | 3          | 1          | 7          | 2          | 1 2>1               | 3.52E-06 |
| 422       | 1720       | 1561       | 1241       | 1277       | 1 2>1               | 1.99E-06 |
| 3         | 4          | 10         | 7          | 4          | 0.999 2>1           | 6.25E-05 |
| 1         | 8          | 13         | 9          | 10         | 0.978 2>1           | 0.00098  |
| 3         | 3          | 6          | 4          | 2          | 1 2>1               | 1.11E-05 |
| 95        | 116        | 137        | 123        | 140        | 0.998 2>1           | 9.89E-05 |
| 5004      | 8382       | 8695       | 7370       | 7481       | 0.974 2>1           | 0.00137  |
| 2789      | 4649       | 5189       | 4373       | 4385       | 0.989 2>1           | 0.000511 |
| 135       | 315        | 276        | 227        | 219        | 0.994 2>1           | 0.00027  |
| 5         | 14         | 5          | 2          | 6          | 0.982 2>1           | 0.000801 |
| 18        | 35         | 22         | 21         | 22         | 0.903 2>1           | 0.004249 |
| 41        | 110        | 85         | 71         | 74         | 0.949 2>1           | 0.002955 |
| 10        | 16         | 23         | 13         | 19         | 0.757 2>1           | 0.016363 |
| 19        | 38         | 37         | 21         | 11         | 0.833 2>1           | 0.006407 |
| 2         | 9          | 8          | 1          | 2          | 0.957 2>1           | 0.002214 |
| 280       | 382        | 290        | 259        | 269        | 0.199 2>1           | 0.09011  |
| 4         | 5          | 5          | 3          | 2          | 1 2>1               | 2.83E-05 |
| 33        | 32         | 30         | 38         | 28         | 0.37 2>1            | 0.046313 |
| 1219      | 1332       | 1256       | 1317       | 1178       | 0.058 2>1           | 0.128092 |
| 20        | 9          | 15         | 24         | 25         | 0.406 2>1           | 0.034419 |
| 96        | 110        | 109        | 93         | 79         | 0.238 2>1           | 0.076437 |
| 6         | 12         | 5          | 8          | 7          | 0.967 2>1           | 0.001883 |
| 64        | 74         | 90         | 94         | 88         | 0.191 2>1           | 0.094688 |
| 666       | 903        | 820        | 664        | 817        | 0.031 2>1           | 0.13319  |
| 1706      | 2607       | 1736       | 1671       | 1795       | 0.018 2>1           | 0.138302 |

|       |       |       |      |      |           |          |
|-------|-------|-------|------|------|-----------|----------|
| 62    | 74    | 89    | 68   | 65   | 0.165 2>1 | 0.108379 |
| 17    | 7     | 18    | 20   | 16   | 0.287 2>1 | 0.067468 |
| 234   | 291   | 250   | 224  | 183  | 0.075 2>1 | 0.118084 |
| 1158  | 1479  | 1239  | 1169 | 1061 | 0.017 1>2 | 0.143359 |
| 99    | 101   | 76    | 72   | 104  | 0.173 1>2 | 0.103806 |
| 8298  | 12937 | 10435 | 7846 | 9116 | 0.002 1>2 | 0.153457 |
| 7266  | 7999  | 9664  | 6455 | 6615 | 0.004 1>2 | 0.148432 |
| 2     | 3     | 3     | 5    | 2    | 1 1>2     | 3.79E-05 |
| 77    | 96    | 66    | 63   | 53   | 0.255 1>2 | 0.071928 |
| 79    | 82    | 86    | 52   | 53   | 0.531 1>2 | 0.026882 |
| 15    | 10    | 17    | 9    | 7    | 0.319 1>2 | 0.058943 |
| 134   | 102   | 109   | 97   | 93   | 0.816 1>2 | 0.01033  |
| 267   | 231   | 267   | 188  | 236  | 0.635 1>2 | 0.023724 |
| 166   | 112   | 147   | 108  | 136  | 0.822 1>2 | 0.007721 |
| 9647  | 10768 | 7459  | 6936 | 6737 | 0.064 1>2 | 0.123101 |
| 141   | 124   | 121   | 94   | 88   | 0.821 1>2 | 0.009014 |
| 270   | 266   | 214   | 227  | 153  | 0.878 1>2 | 0.005165 |
| 22    | 13    | 21    | 14   | 12   | 0.643 1>2 | 0.018832 |
| 161   | 201   | 35    | 71   | 100  | 0.188 1>2 | 0.099228 |
| 745   | 728   | 629   | 463  | 438  | 0.787 1>2 | 0.013192 |
| 2     | 2     | 1     | 2    | 3    | 1 1>2     | 1.78E-05 |
| 11    | 6     | 3     | 9    | 7    | 0.977 1>2 | 0.001166 |
| 73    | 48    | 43    | 24   | 47   | 0.99 1>2  | 0.000424 |
| 104   | 74    | 62    | 72   | 66   | 0.999 1>2 | 4.73E-05 |
| 76    | 55    | 38    | 59   | 35   | 0.998 1>2 | 0.000139 |
| 6     | 6     | 2     | 3    | 2    | 0.998 1>2 | 0.000119 |
| 6     | 5     | 4     | 2    | 4    | 0.996 1>2 | 0.00017  |
| 2495  | 1531  | 1361  | 1037 | 1263 | 1 1>2     | 5.62E-06 |
| 29    | 16    | 24    | 12   | 12   | 0.999 1>2 | 7.92E-05 |
| 6     | 0     | 1     | 8    | 4    | 0.992 1>2 | 0.000339 |
| 3     | 0     | 1     | 3    | 1    | 1 1>2     | 3.42E-05 |
| 4     | 1     | 2     | 3    | 2    | 1 1>2     | 1.56E-05 |
| 843   | 388   | 376   | 318  | 300  | 1 1>2     | 1.90E-07 |
| 3     | 2     | 2     | 3    | 0    | 1 1>2     | 1.34E-05 |
| 14    | 6     | 5     | 3    | 9    | 0.983 1>2 | 0.000654 |
| 19502 | 9071  | 6759  | 6093 | 5527 | 1 1>2     | 2.10E-07 |
| 31    | 4     | 4     | 4    | 4    | 0.999 1>2 | 7.06E-05 |

| FWER.DE  | arp6    | avera wt | average fold | chang mean | level ratio | ((arp6/wt**100, %) |
|----------|---------|----------|--------------|------------|-------------|--------------------|
| 0        | 9       | 6327.25  | -9.46        | 7.9        | 0.14        |                    |
| 1.37E-12 | 0.5     | 104.75   | -7.71        | 2.86       | 0.48        |                    |
| 2.08E-08 | 0.25    | 21.5     | -6.43        | 1.21       | 1.16        |                    |
| 2.73E-08 | 0.25    | 20.5     | -6.36        | 1.18       | 1.22        |                    |
| 2.24E-08 | 0.5     | 40.75    | -6.35        | 2.17       | 1.23        |                    |
| 3.53E-06 | 1       | 7.75     | -2.95        | 1.48       | 12.9        |                    |
| 5.01E-11 | 144.75  | 1053.5   | -2.86        | 8.61       | 13.74       |                    |
| 6.01E-06 | 9.75    | 48.75    | -2.32        | 4.45       | 20          |                    |
| 0.023945 | 4.5     | 16       | -1.83        | 3.08       | 28.13       |                    |
| 1.23E-05 | 21.75   | 72.5     | -1.74        | 5.31       | 30          |                    |
| 0.004257 | 10      | 32.5     | -1.7         | 4.17       | 30.77       |                    |
| 1.99E-05 | 0.75    | 2.25     | -1.58        | 0.38       | 33.33       |                    |
| 0.002184 | 1.25    | 3.5      | -1.49        | 1.06       | 35.71       |                    |
| 0.002473 | 1.25    | 3.5      | -1.49        | 1.06       | 35.71       |                    |
| 9.38E-06 | 0.75    | 2        | -1.42        | 0.29       | 37.5        |                    |
| 0.000302 | 1.25    | 3.25     | -1.38        | 1.01       | 38.46       |                    |
| 0.000167 | 563.75  | 1449.75  | -1.36        | 9.82       | 38.89       |                    |
| 0.006542 | 3.25    | 6.25     | -0.94        | 2.17       | 52          |                    |
| 0.110713 | 5.25    | 10       | -0.93        | 2.86       | 52.5        |                    |
| 0.001014 | 2       | 3.75     | -0.91        | 1.45       | 53.33       |                    |
| 0.010625 | 77.75   | 129      | -0.73        | 6.65       | 60.27       |                    |
| 0.153964 | 4862.25 | 7982     | -0.72        | 12.6       | 60.92       |                    |
| 0.05776  | 2895.5  | 4649     | -0.68        | 11.84      | 62.28       |                    |
| 0.030082 | 161.5   | 259.25   | -0.68        | 7.68       | 62.3        |                    |
| 0.090684 | 4.25    | 6.75     | -0.67        | 2.42       | 62.96       |                    |
| 0.427486 | 16.5    | 25       | -0.6         | 4.34       | 66          |                    |
| 0.314912 | 56.25   | 85       | -0.6         | 6.11       | 66.18       |                    |
| 0.913394 | 11.75   | 17.75    | -0.6         | 3.85       | 66.2        |                    |
| 0.581308 | 19      | 26.75    | -0.49        | 4.49       | 71.03       |                    |
| 0.242626 | 4       | 5        | -0.32        | 2.16       | 80          |                    |
| 1        | 258     | 300      | -0.22        | 8.12       | 86          |                    |
| 0.002774 | 3.25    | 3.75     | -0.21        | 1.8        | 86.67       |                    |
| 0.999869 | 28.25   | 32       | -0.18        | 4.91       | 88.28       |                    |
| 1        | 1123.75 | 1270.75  | -0.18        | 10.22      | 88.43       |                    |
| 0.997736 | 16.25   | 18.25    | -0.17        | 4.11       | 89.04       |                    |
| 1        | 88.25   | 97.75    | -0.15        | 6.54       | 90.28       |                    |
| 0.208712 | 7.5     | 8        | -0.09        | 2.95       | 93.75       |                    |
| 1        | 81.5    | 86.5     | -0.09        | 6.39       | 94.22       |                    |
| 1        | 756.75  | 801      | -0.08        | 9.6        | 94.48       |                    |
| 1        | 1853.75 | 1952.25  | -0.07        | 10.89      | 94.95       |                    |

|          |          |         |       |       |        |
|----------|----------|---------|-------|-------|--------|
| 1        | 71.5     | 74      | -0.05 | 6.18  | 96.62  |
| 1        | 14.75    | 15.25   | -0.05 | 3.91  | 96.72  |
| 1        | 235      | 237     | -0.01 | 7.88  | 99.16  |
| 1        | 1242.25  | 1237    | 0.01  | 10.28 | 100.42 |
| 1        | 90.5     | 88.25   | 0.04  | 6.48  | 102.55 |
| 1        | 10544.75 | 10083.5 | 0.06  | 13.33 | 104.57 |
| 1        | 8533     | 7683.25 | 0.15  | 12.98 | 111.06 |
| 0.003817 | 3.75     | 3.25    | 0.21  | 1.8   | 115.38 |
| 1        | 81.25    | 69.5    | 0.23  | 6.23  | 116.91 |
| 0.987937 | 83       | 68.25   | 0.28  | 6.23  | 121.61 |
| 0.999995 | 13.25    | 10.75   | 0.3   | 3.58  | 123.26 |
| 0.769426 | 127.5    | 100.25  | 0.35  | 6.82  | 127.18 |
| 0.977288 | 298      | 230.5   | 0.37  | 8.03  | 129.28 |
| 0.656025 | 164.25   | 125.75  | 0.39  | 7.17  | 130.62 |
| 1        | 10433.5  | 7975    | 0.39  | 13.16 | 130.83 |
| 0.717428 | 139.75   | 106.75  | 0.39  | 6.93  | 130.91 |
| 0.497548 | 291.25   | 215     | 0.44  | 7.97  | 135.47 |
| 0.944319 | 21       | 15      | 0.49  | 4.15  | 140    |
| 1        | 148      | 101.75  | 0.54  | 6.94  | 145.45 |
| 0.853753 | 826.25   | 564.5   | 0.55  | 9.42  | 146.37 |
| 0.00167  | 3.25     | 2       | 0.7   | 1.35  | 162.5  |
| 0.131519 | 10.25    | 6.25    | 0.71  | 3     | 164    |
| 0.047706 | 67.75    | 40.5    | 0.74  | 5.71  | 167.28 |
| 0.004865 | 116.5    | 68.5    | 0.77  | 6.48  | 170.07 |
| 0.015153 | 80.5     | 46.75   | 0.78  | 5.94  | 172.19 |
| 0.012855 | 5.75     | 3.25    | 0.82  | 2.11  | 176.92 |
| 0.018679 | 6.75     | 3.75    | 0.85  | 2.33  | 180    |
| 0.000495 | 2749.25  | 1298    | 1.08  | 10.88 | 211.81 |
| 0.008442 | 35.5     | 16      | 1.15  | 4.57  | 221.88 |
| 0.037952 | 7.5      | 3.25    | 1.21  | 2.3   | 230.77 |
| 0.00341  | 3        | 1.25    | 1.26  | 0.95  | 240    |
| 0.001447 | 5        | 2       | 1.32  | 1.66  | 250    |
| 1.39E-05 | 877      | 345.5   | 1.34  | 9.1   | 253.84 |
| 0.00123  | 4.5      | 1.75    | 1.36  | 1.49  | 257.14 |
| 0.073954 | 15.25    | 5.75    | 1.41  | 3.23  | 265.22 |
| 1.55E-05 | 20351.75 | 6862.5  | 1.57  | 13.53 | 296.56 |
| 0.007458 | 22       | 4       | 2.46  | 3.23  | 550    |
